# Supplementary material for: Maternal Iron Deficiency and Environmental Lead (Pb) Exposure Alter the Predictive Value of Blood Pb Levels on Brain Pb Burden in the Offspring in a Dietary Mouse Model: An Important Consideration for Cumulative Risk in Development
Source: MDPI journal article supplement (doi:10.3390/nu15194101), 2023-09-22
Supplement: s1 [file s1]

Supplementary Table: Contributions of each dam and pup to each treatment and outcome measure

| Group<br>(# Dams) | Dam ID | Litter Size | #<br>Females | #<br>Males | HESKA |     | Dam Metals |       | Pup Metals |       |       |
|-------------------|--------|-------------|--------------|------------|-------|-----|------------|-------|------------|-------|-------|
|                   |        |             |              |            | Dam   | Pup | Blood      | Femur | Blood      | Femur | Brain |
| 0-IN<br>(n=14)    | 1      | 9           | 5            | 4          | -     | -   | +          | +     | 4          | -     | 4     |
|                   | 2      | 13          | 9            | 4          | -     | -   | -          | -     | 4          | -     | 4     |
|                   | 3      | 13          | 6            | 7          | -     | -   | +          | +     | 4          | -     | 4     |
|                   | 4      | 5           | 2            | 3          | -     | -   | +          | +     | 2          | -     | 2     |
|                   | 5      | 8           | 1            | 7          | -     | -   | -          | -     | 3          | 3     | 2     |
|                   | 6      | 8           | 4            | 4          | -     | -   | -          | -     | 4          | 4     | 2     |
|                   | 7      | 7           | 3            | 4          | -     | -   | -          | -     | -          | 2     | -     |
|                   | 8      | 7           | 3            | 4          | -     | -   | -          | -     | -          | 2     | -     |
|                   | 43     | 8           | 3            | 5          | +     | 8   | -          | -     | -          | -     | -     |
|                   | 44     | 12          | 5            | 7          | +     | 12  | -          | -     | -          | -     | -     |
|                   | 45     | 9           | 2            | 7          | +     | 9   | -          | -     | -          | -     | -     |
|                   | 49     | 10          | 1            | 9          | -     | 3   | -          | -     | -          | -     | -     |
|                   | 50     | 8           | 4            | 4          | -     | 4   | -          | -     | -          | -     | -     |
|                   | 51     | 6           | 2            | 4          | -     | 1   | -          | -     | -          | -     | -     |
| 0-ID<br>(n=12)    | 9      | 12          | 5            | 7          | -     | -   | +          | +     | 4          | -     | 4     |
|                   | 10     | 9           | 6            | 3          | -     | -   | +          | +     | 4          | -     | 4     |
|                   | 11     | 10          | 4            | 6          | -     | -   | +          | +     | 4          | -     | 4     |
|                   | 12     | 13          | 7            | 6          | -     | -   | +          | +     | 2          | -     | 2     |
|                   | 13     | 10          | 6            | 4          | -     | -   | -          | -     | 4          | 4     | 2     |
|                   | 14     | 12          | 6            | 6          | -     | -   | -          | -     | 4          | 4     | 2     |
|                   | 15     | 12          | 7            | 5          | -     | -   | -          | -     | -          | 3     | -     |
|                   | 16     | 10          | 8            | 2          | -     | -   | +          | +     | -          | 2     | -     |
|                   | 46     | 6           | 1            | 5          | +     | 6   | -          | -     | -          | -     | -     |
|                   | 47     | 8           | 4            | 4          | +     | 5   | -          | -     | -          | -     | -     |
|                   | 48     | 10          | 3            | 6          | +     | -   | -          | -     | -          | -     | -     |
|                   | 52     | 9           | 6            | 3          | -     | 3   | -          | -     | -          | -     | -     |
| 19-IN<br>(n=4)    | 32     | 10          | 7            | 3          | +     | 4   | +          | +     | 4          | 4     | 4     |
|                   | 33     | 10          | 6            | 4          | +     | 4   | +          | +     | 4          | 4     | 4     |
|                   | 34     | 10          | 6            | 4          | +     | 4   | +          | +     | 4          | 4     | 4     |
|                   | 35     | 15          | 6            | 9          | +     | 7   | +          | +     | 4          | 4     | 4     |
| 19-ID<br>(n=4)    | 36     | 9           | 5            | 4          | +     | 4   | +          | +     | 4          | 4     | 4     |
|                   | 37     | 6           | 3            | 3          | +     | 2   | +          | +     | 4          | 4     | 4     |
|                   | 38     | 11          | 9            | 2          | +     | 4   | +          | +     | 4          | 4     | 4     |
|                   | 39     | 12          | 3            | 9          | +     | 4   | +          | +     | 4          | 4     | 4     |
| 50-IN<br>(n=11)   | 17     | 12          | 6            | 6          | +     | 4   | -          | -     | -          | -     | 4     |
|                   | 18     | 10          | 7            | 3          | +     | 4   | -          | -     | -          | -     | 4     |
|                   | 19     | 8           | 6            | 2          | +     | 4   | -          | -     | -          | -     | 4     |
|                   | 20     | 5           | 0            | 5          | +     | 2   | +          | +     | 2          | 3     | 2     |
|                   | 21     | 9           | 3            | 6          | -     | -   | +          | +     | 2          | -     | -     |
|                   | 22     | 11          | 4            | 7          | -     | -   | -          | -     | 4          | -     | -     |
|                   | 23     | 7           | 2            | 5          | -     | -   | -          | -     | 4          | -     | -     |
|                   | 24     | 7           | 4            | 3          | +     | 2   | +          | +     | 4          | 4     | -     |
|                   | 25     | 5           | 1            | 4          | -     | -   | -          | -     | -          | 2     | -     |
|                   | 40     | 9           | 3            | 6          | -     | -   | -          | -     | 4          | 4     | -     |
|                   | 41     | 11          | 6            | 5          | -     | -   | -          | -     | 2          | 1     | -     |
| 50-ID<br>(n=7)    | 26     | 9           | 2            | 7          | +     | 4   | -          | -     | -          | -     | 4     |
|                   | 27     | 9           | 4            | 5          | +     | 4   | -          | -     | -          | -     | 4     |
|                   | 28     | 3           | 2            | 1          | +     | 2   | +          | +     | 1          | -     | 2     |
|                   | 29     | 12          | 9            | 3          | +     | 5   | +          | +     | 4          | 6     | 4     |
|                   | 30     | 5           | 2            | 3          | -     | -   | +          | +     | 2          | -     | -     |
|                   | 31     | 9           | 3            | 6          | +     | 3   | +          | +     | 4          | 4     | -     |
|                   | 42     | 13          | 10           | 3          | -     | 4   | -          | -     | 3          | 4     | -     |

Symbols and Abbreviations: “+” = Dam included in analysis column; Pups in “Bold” were used for Fig. 9
